# Supplementary material for: A Paper-Based Biomimetic Sensing Device for the Discrimination of Original and Fraudulent Cigarette Brands Using Mixtures of MoS2 Quantum Dots and Organic Dyes
Source: MDPI journal article supplement (doi:10.3390/bios13070705), 2023-07-04
Supplement: s1 [file s1]

Article

# A Paper-Based Biomimetic Sensing Device for the Discrimination of Original and Fraudulent Cigarette Brands Using Mixtures of MoS<sub>2</sub> Quantum Dots and Organic Dyes

Fereshte Mohamadi Gharaghani <sup>1</sup>, Sara Mostafapour <sup>1</sup> and Bahram Hemmateenejad <sup>1,2,\*</sup>

<sup>1</sup> Chemistry Department, Shiraz University, Shiraz 71456, Iran; fereshtemohamadi.chem@gmail.com (F.M.G.); mostafapoursara69@gmail.com (S.M.)

<sup>2</sup> Medicinal and Natural Products Chemistry Research Centre, Shiraz University of Medical Sciences, Shiraz 7134853734, Iran

\* Correspondence: hemmatb@shirazu.ac.ir

**Table S1.** The chemical formula and structure of the dyes employed in the fabrication sensor array.

| Compound Name           | Chemical Formula               | Chemical Structure |
|-------------------------|--------------------------------|--------------------|
| Chlorophenol red (CPR)  | $C_{19}H_{12}Cl_2O_5S$         |                    |
| Bromocresol green (BCG) | $C_{21}H_{14}Br_4O_5S$         |                    |
| Diamond fuchsin (DF)    | $C_{20}H_{19}N_3 \cdot HCl$    |                    |
| Thymol blue (TB)        | $C_{27}H_{30}O_5S$             |                    |
| Diamine green (DG)      | $C_{34}H_{22}N_8Na_2O_{10}S_2$ |                    |
| Bromophenol blue (BPB)  | $C_{19}H_{10}Br_4O_5S$         |                    |
| Phenol red (PR)         | $C_{19}H_{14}O_5S$             |                    |

Methyl green (MG)

 $C_{26}H_{33}Cl_2N_3$ 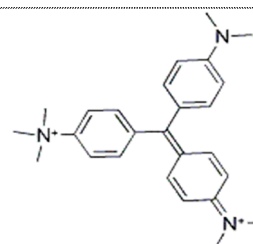

Brilliant green (BG)

 $C_{27}H_{33}N_2 \cdot HO_4S$ 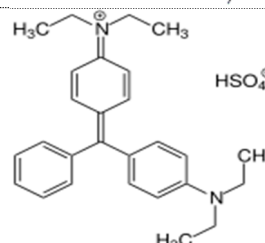**Table S2.** The structure and classification of investigated of cigarette smoke volatile compounds.

| Family               | Compound name       | Structure |
|----------------------|---------------------|-----------|
| Alcohol              | Benzyl alcohol      |           |
|                      | Ethyl acetate       |           |
| Aromatic hydrocarbon | Ethylbenzene        |           |
|                      | Toluene             |           |
|                      | Ortho- xylene       |           |
| Ketone               | Ethyl methyl ketone |           |
|                      | Acetophenone        |           |

Formaldehyde

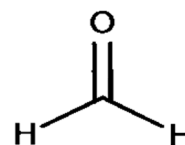

Acetaldehyde

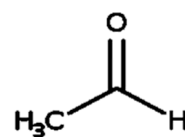**Aldehyde**

Crotonaldehyde

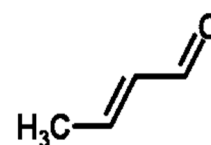

Benzaldehyde

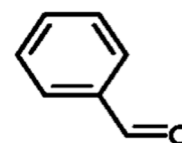

Anisaldehyde

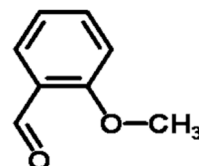

1-Octene

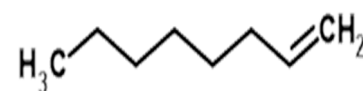**Hydrocarbon**

Heptane

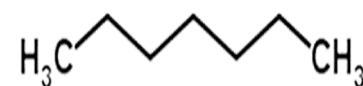

**Table S3.** Statistic parameters for PCA analysis for 14 VOCs via utilization of the response intensity of the MoS<sub>2</sub> QDs sensor array.

| Parameters | Sensitivity |      | Specificity |      | Precision |      |
|------------|-------------|------|-------------|------|-----------|------|
|            | Training    | CV   | Training    | CV   | Training  | CV   |
| Class1     | 1.00        | 1.00 | 1.00        | 1.00 | 1.00      | 1.00 |
| Class2     | 1.00        | 0.83 | 0.99        | 0.99 | 0.86      | 0.83 |
| Class3     | 1.00        | 1.00 | 1.00        | 1.00 | 1.00      | 1.00 |
| Class4     | 1.00        | 0.83 | 1.00        | 0.97 | 1.00      | 0.71 |
| Class5     | 1.00        | 0.83 | 1.00        | 0.99 | 1.00      | 0.83 |
| Class6     | 1.00        | 1.00 | 1.00        | 1.00 | 1.00      | 1.00 |
| Class7     | 1.00        | 1.00 | 1.00        | 1.00 | 1.00      | 1.00 |
| Class8     | 0.83        | 0.67 | 1.00        | 0.99 | 1.00      | 0.80 |
| Class9     | 0.80        | 0.60 | 0.99        | 0.97 | 0.80      | 0.60 |
| Class10    | 1.00        | 1.00 | 1.00        | 1.00 | 1.00      | 1.00 |
| Class11    | 0.83        | 0.83 | 0.99        | 0.97 | 0.83      | 0.71 |
| Class12    | 1.00        | 0.83 | 1.00        | 0.99 | 1.00      | 0.83 |
| Class13    | 1.00        | 0.67 | 1.00        | 0.99 | 1.00      | 0.80 |
| Class14    | 1.00        | 1.00 | 1.00        | 1.00 | 1.00      | 1.00 |

\*CV: Cross-validation.

**Table S4.** Statistic parameters for LDA analysis for 14 VOCs via utilization of the response intensity of the MoS<sub>2</sub> QDs sensor array.

| Parameters | Sensitivity |      | Specificity |      | Precision |      |
|------------|-------------|------|-------------|------|-----------|------|
|            | Training    | CV   | Training    | CV   | Training  | CV   |
| Class1     | 1.00        | 1.00 | 1.00        | 1.00 | 1.00      | 1.00 |
| Class2     | 1.00        | 1.00 | 1.00        | 1.00 | 1.00      | 1.00 |
| Class3     | 1.00        | 1.00 | 1.00        | 1.00 | 1.00      | 1.00 |
| Class4     | 1.00        | 1.00 | 1.00        | 1.00 | 1.00      | 1.00 |
| Class5     | 1.00        | 1.00 | 1.00        | 1.00 | 1.00      | 1.00 |
| Class6     | 1.00        | 1.00 | 1.00        | 1.00 | 1.00      | 1.00 |
| Class7     | 1.00        | 1.00 | 1.00        | 1.00 | 1.00      | 1.00 |
| Class8     | 1.00        | 1.00 | 1.00        | 1.00 | 1.00      | 1.00 |
| Class9     | 1.00        | 1.00 | 1.00        | 1.00 | 1.00      | 1.00 |
| Class10    | 1.00        | 1.00 | 1.00        | 1.00 | 1.00      | 1.00 |
| Class11    | 1.00        | 1.00 | 1.00        | 1.00 | 1.00      | 1.00 |
| Class12    | 1.00        | 1.00 | 1.00        | 1.00 | 1.00      | 1.00 |
| Class13    | 1.00        | 1.00 | 1.00        | 1.00 | 1.00      | 1.00 |
| Class14    | 1.00        | 1.00 | 1.00        | 1.00 | 1.00      | 1.00 |

\*CV: Cross-validation.

**Table S5.** Statistical parameters of LDA analysis of different original brands via utilization of the response intensity of the MoS<sub>2</sub> QDs sensor array.

| Parameters | Sensitivity |      | Specificity |      | Precision |      |
|------------|-------------|------|-------------|------|-----------|------|
|            | Training    | CV   | Training    | CV   | Training  | CV   |
| Class1     | 1.00        | 0.89 | 1.00        | 1.00 | 1.00      | 1.00 |
| Class2     | 1.00        | 1.00 | 1.00        | 1.00 | 1.00      | 1.00 |
| Class3     | 1.00        | 0.78 | 1.00        | 0.92 | 1.00      | 0.70 |
| Class4     | 1.00        | 0.67 | 1.00        | 0.94 | 1.00      | 0.75 |
| Class5     | 1.00        | 0.78 | 1.00        | 0.92 | 1.00      | 0.70 |

\*CV: Cross-validation.

**Table S6.** Statistic parameters related to LDA scatter plot of discrimination of different original brands via utilization of the response intensity of the MoS<sub>2</sub> QDs sensor array.

| Plot | Parameters | Sensitivity |      | Specificity |      | Precision |      |
|------|------------|-------------|------|-------------|------|-----------|------|
|      |            | Training    | CV   | Training    | CV   | Training  | CV   |
| A    | Class 1    | 1.00        | 1.00 | 1.00        | 1.00 | 1.00      | 1.00 |
|      | Class 2    | 1.00        | 1.00 | 1.00        | 1.00 | 1.00      | 1.00 |
| B    | Class 1    | 1.00        | 0.89 | 1.00        | 0.94 | 1.00      | 0.80 |
|      | Class 2    | 1.00        | 0.94 | 1.00        | 0.89 | 1.00      | 0.97 |
| C    | Class 1    | 1.00        | 1.00 | 1.00        | 0.86 | 1.00      | 0.64 |
|      | Class 2    | 1.00        | .86  | 1.00        | 1.00 | 1.00      | 1.00 |
| D    | Class 1    | 1.00        | 1.00 | 1.00        | 0.82 | 1.00      | 0.64 |
|      | Class 2    | 1.00        | 0.82 | 1.00        | 1.00 | 1.00      | 1.00 |

\*CV: Cross-validation.

**Table S7.** Statistic parameters of LDA analysis of original and fraud samples.

| Parameters | Sensitivity |      | Specificity |      | Precision |      |
|------------|-------------|------|-------------|------|-----------|------|
|            | Training    | CV   | Training    | CV   | Training  | CV   |
| Class1     | 0.94        | 0.85 | 0.99        | 0.97 | 0.97      | 0.90 |
| Class 2    | 0.99        | 0.97 | 0.94        | 0.85 | 0.98      | 0.95 |

\*CV: Cross-validation.

**Table S8.** Statistical parameters of LDA study of low quality fraud tobacco in cigarettes via utilization of the response intensity of the MoS<sub>2</sub> QDs sensor array.

| Parameters | Sensitivity |      | Specificity |      | Precision |      |
|------------|-------------|------|-------------|------|-----------|------|
|            | Training    | CV   | Training    | CV   | Training  | CV   |
| Class1     | 1.00        | 1.00 | 1.00        | 0.89 | 1.00      | 0.69 |
| Class2     | 1.00        | 0.85 | 1.00        | 1.00 | 1.00      | 1.00 |
| Class3     | 1.00        | 0.89 | 1.00        | 0.97 | 1.00      | 0.89 |

\*CV: Cross-validation.

**Table S9.** Experimental condition for study tobacco quality.

| Experimental Set | Number of Repeat | Original Tobacco (% W/W) | Fraud Tobacco (% W/W) |
|------------------|------------------|--------------------------|-----------------------|
| 1                | 9                | 100                      | 0                     |
| 2                | 9                | 75                       | 25                    |
| 3                | 9                | 50                       | 50                    |
| 4                | 9                | 25                       | 75                    |
| 5                | 9                | 0                        | 100                   |

**Table S10.** Statistical parameters for LDA analysis of tobacco fraud percentage via utilization of the response intensity of the MoS<sub>2</sub> QDs sensor array.

| Parameters | Sensitivity |      | Specificity |      | Precision |      |
|------------|-------------|------|-------------|------|-----------|------|
|            | Training    | CV   | Training    | CV   | Training  | CV   |
| Class1     | 1.00        | 1.00 | 1.00        | 0.94 | 1.00      | 0.82 |
| Class2     | 1.00        | 0.67 | 1.00        | 0.86 | 1.00      | 0.55 |
| Class3     | 1.00        | 0.56 | 1.00        | 0.92 | 1.00      | 0.63 |
| Class4     | 1.00        | 0.33 | 1.00        | 0.86 | 1.00      | 0.38 |
| Class5     | 1.00        | 0.67 | 1.00        | 0.97 | 1.00      | 0.86 |

\*CV: Cross-validation.

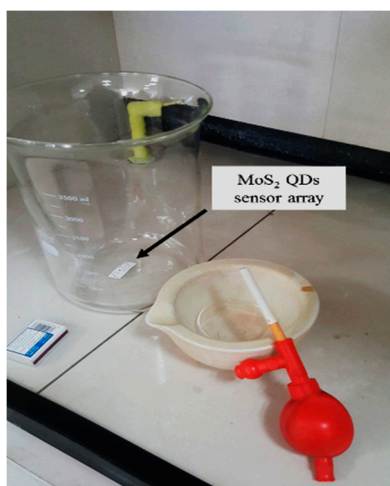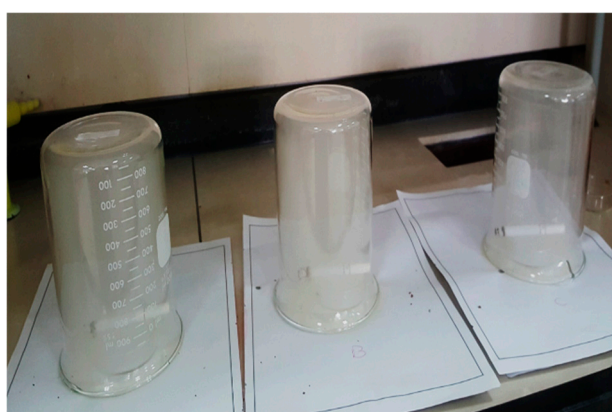

**Figure S1.** Cigarette smoke sampling. Placing the sensor array inside the wall of the container (**left**), and sensor exposure to burning cigarette smoke (**right**).

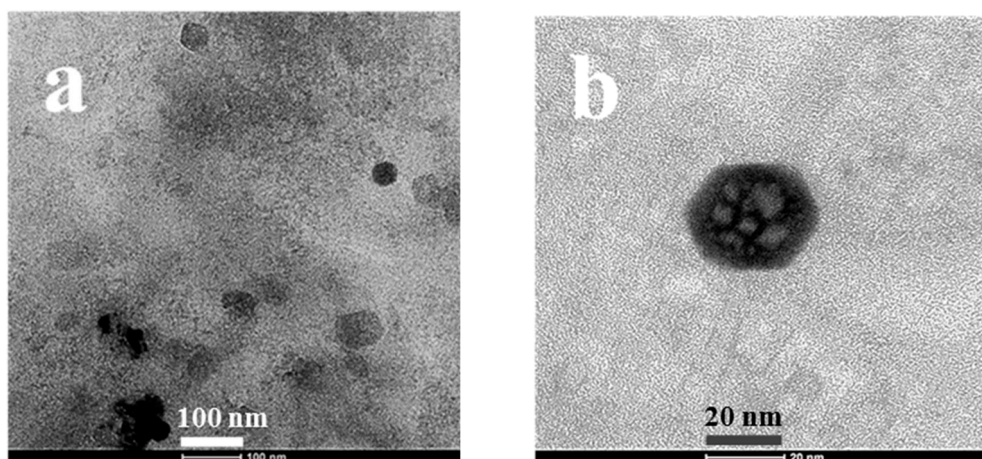

**Figure S2.** HR-TEM images of the synthesized MoS<sub>2</sub> QDs with two different magnifications. Display of the present of polyhedral particles (a), and white particles on a hexagonal particle's surface (b).

Figure S2 shows the typical HR-TEM images of the synthesized MoS<sub>2</sub> QDs with two different magnifications. Figure S2a shows a set of polyhedral particles, probably the NaCl crystals that accompany QDs as a by-product in the synthesis procedure and white particles on its surface are assumed MoS<sub>2</sub> QDs. Figure S2b shows that the size of these white particles is under 10 nm.

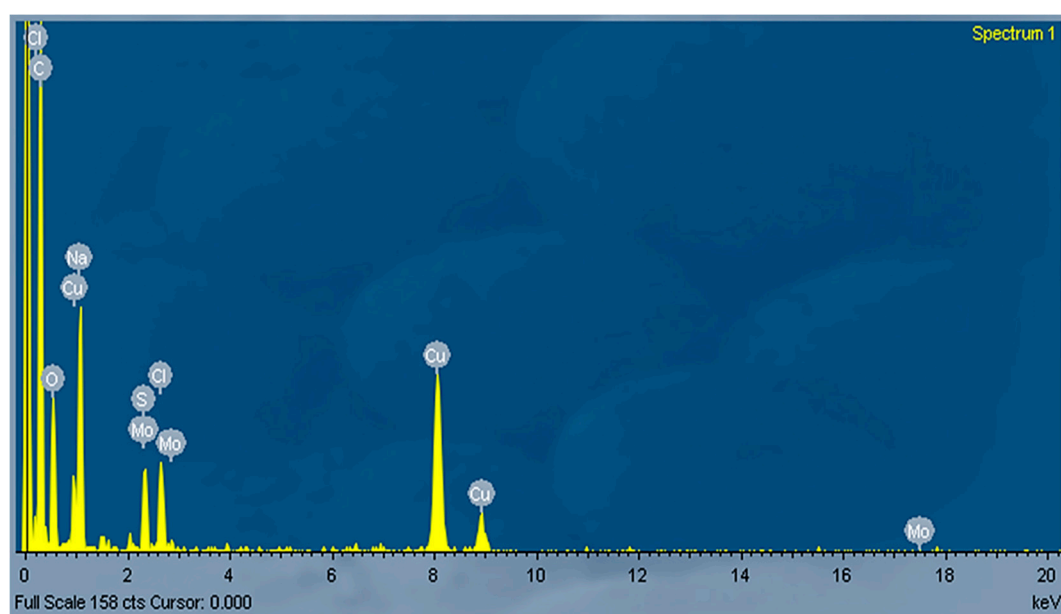

**Figure S3.** Energy-dispersive X-ray spectroscopy (EDS) of the synthesized MoS<sub>2</sub> QDs.



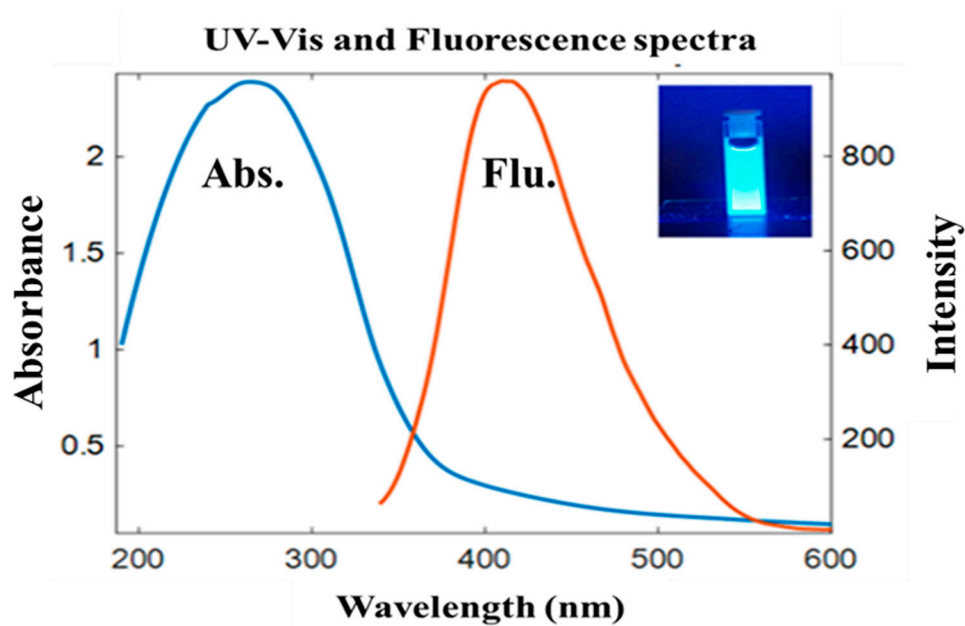

**Figure S4.** UV-Vis and fluorescence spectra of MoS<sub>2</sub> QDs. The intercept is image of MoS<sub>2</sub> QDs solution under UV irradiation (280 nm).

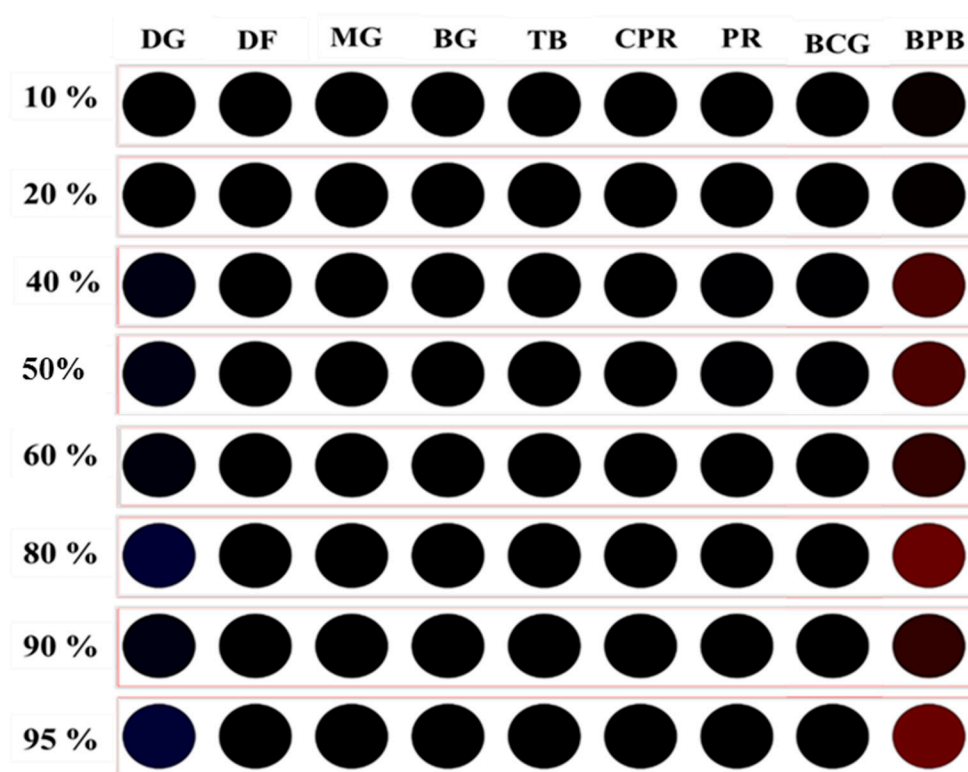

**Figure S5.** Sensor response in different humidity between 10 to 95%.

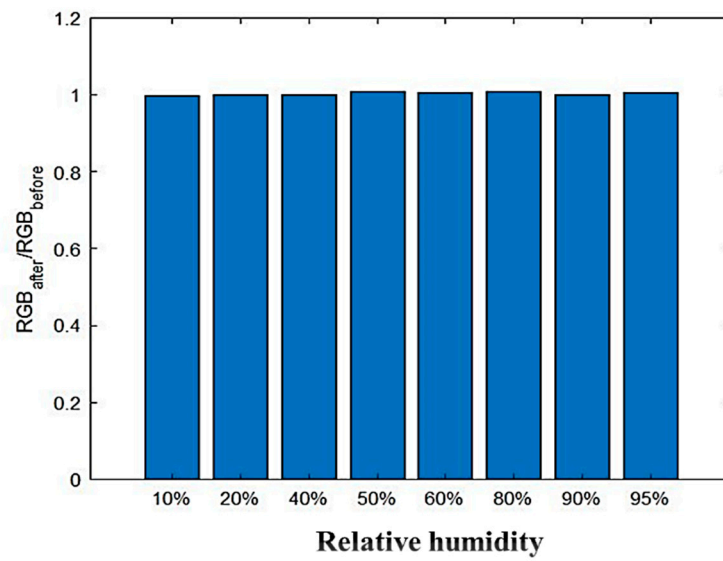

**Figure S6.** Plot of the RGB changes in different humidity (10-95 %).

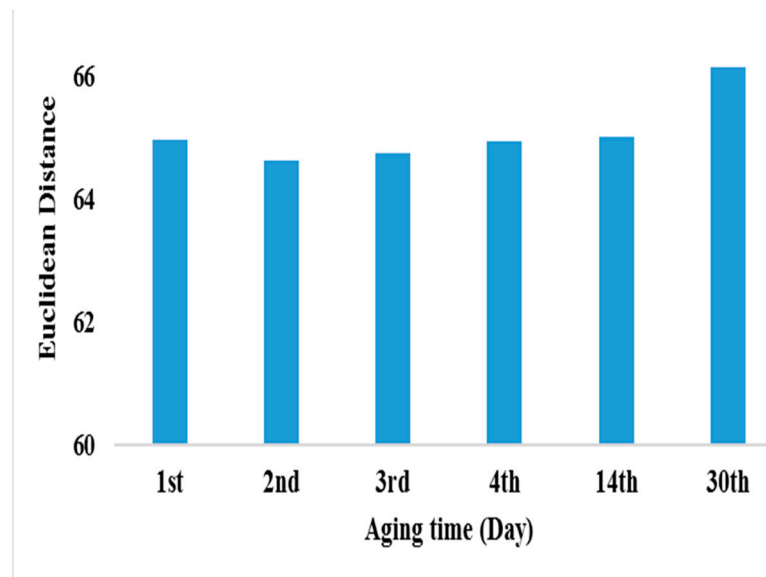

**Figure S7.** Durability of fabricated  $MoS_2$  QDs sensor array.

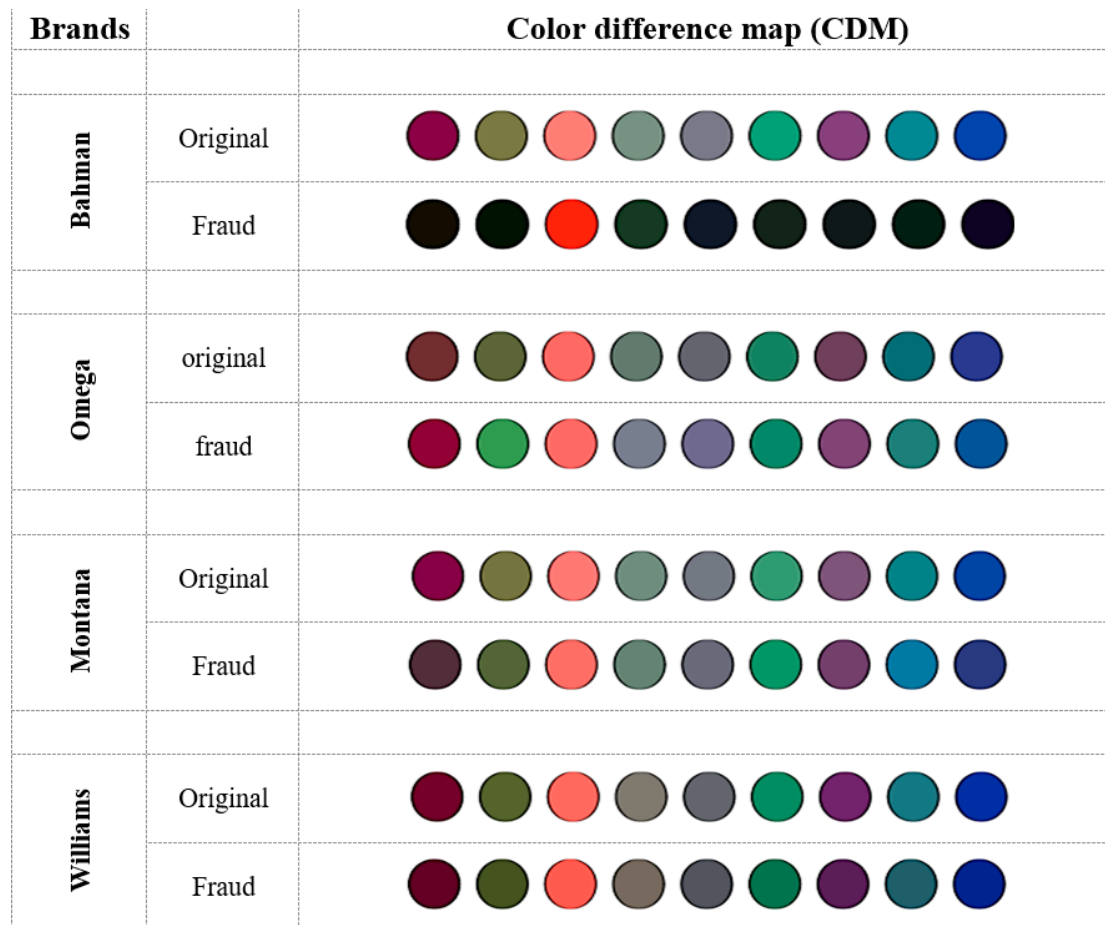

**Figure S8.** CDMs for four original and for fraud brands via utilization of the response intensity of the MoS<sub>2</sub> QDs sensor array.
